# Supplementary material for: Pattern and Determinants of Chemical and Drug Overdose Poisoning, Makkah, Saudi Arabia 2018-2019
Source: Preprints.org preprint supplement (doi:10.20944/preprints202311.1053.v1), 2023-11-16
Supplement: Supplementary file 1 [file supplementary]

**Pattern and Determinants of Chemical and Drug Overdose Poisoning, Makkah, Saudi Arabia 2018-2019**

Ghanim. Hamid. Al-Khattabi1*

1 Consultant of Preventive Medicine and Public Health, Epidemiologist, Population Health Management, Chief Healthcare Excellence Executive Office, Makkah Healthcare Cluster, Saudi Arabia

Email: [drghanimm@gmail.com](mailto:drghanimm@gmail.com)

Email: galharbe@makkahhc.sa

Tel: +966564444399

*Corresponding Author.

**Corresponding Author Details**:

**Name:** Dr. Ghanim. Hamid. Al-Khattabi

**Affiliation and address**: Consultant of Preventive Medicine and Public Health, Epidemiologist, Population Health Management, Chief Healthcare Excellence Executive Office, Makkah Healthcare Cluster, Saudi Arabia

**Email ID:** [drghanimm@gmail.com](mailto:drghanimm@gmail.com)

**Alternative email**: [dralkhattabi@gmail.com](mailto:dralkhattabi@gmail.com)

**Institutional email**: galharbe@makkahhc.sa

**Contact No**.: +966564444399

+966570570057

**Conflict of Interest**: None

**Funding:** None
